# Supplementary material
Source: ML conference proceedings conference paper supplement (https://proceedings.mlr.press/v97/holland19a.html)
Supplement: Supplementary file 1 [file holland19a-supp.pdf]

*Supplemental material:*  
**Better generalization with less data using robust  
gradient descent**

Matthew J. Holland  
Osaka University

Kazushi Ikeda  
Nara Institute of Science and Technology

## A Technical appendix

### A.1 Preliminaries

Our generic data shall be denoted by  $\mathbf{z} \in \mathcal{Z}$ . Let  $\mu$  denote a probability measure on  $\mathcal{Z}$ , equipped with an appropriate  $\sigma$ -field. Data samples shall be assumed independent and identically distributed (iid), written  $\mathbf{z}_1, \dots, \mathbf{z}_n$ . We shall work with loss function  $l : \mathbb{R}^d \times \mathcal{Z} \rightarrow \mathbb{R}_+$  throughout, with  $l(\cdot; \mathbf{z})$  assumed differentiable for each  $\mathbf{z} \in \mathcal{Z}$ . Write  $\mathbf{P}$  for a generic probability measure, most commonly the product measure induced by the sample. Let  $f : \mathcal{Z} \rightarrow \mathbb{R}$  be an measurable function. Expectation is written  $\mathbf{E}_\mu f(\mathbf{z}) := \int f d\mu$ , with variance  $\text{var}_\mu f(\mathbf{z})$  defined analogously. For  $d$ -dimensional Euclidean space  $\mathbb{R}^d$ , the usual ( $\ell_2$ ) norm shall be denoted  $\|\cdot\|$  unless otherwise specified. For function  $F$  on  $\mathbb{R}^d$  with partial derivatives defined, write the gradient as  $F'(\mathbf{u}) := (F'_1(\mathbf{u}), \dots, F'_d(\mathbf{u}))$  where for short, we write  $F'_j(\mathbf{u}) := \partial F(\mathbf{u})/\partial u_j$ . For integer  $k$ , write  $[k] := \{1, \dots, k\}$  for all the positive integers from 1 to  $k$ . Risk shall be denoted  $R(\mathbf{w}) := \mathbf{E}_\mu l(\mathbf{w}; \mathbf{z})$ , and its gradient  $\mathbf{g}(\mathbf{w}) := R'(\mathbf{w})$ . We make a running assumption that we can differentiate under the integral sign in each coordinate [1, 6], namely that

$$\mathbf{g}(\mathbf{w}) = \left( \mathbf{E}_\mu \frac{\partial l(\mathbf{w}; \mathbf{z})}{\partial w_1}, \dots, \mathbf{E}_\mu \frac{\partial l(\mathbf{w}; \mathbf{z})}{\partial w_d} \right). \quad (1)$$

Smoothness and convexity of functions shall also be utilized. For convex function  $F$  on convex set  $\mathcal{W}$ , say that  $F$  is  $\lambda$ -Lipschitz if, for all  $\mathbf{w}_1, \mathbf{w}_2 \in \mathcal{W}$  we have  $|F(\mathbf{w}_1) - F(\mathbf{w}_2)| \leq \lambda \|\mathbf{w}_1 - \mathbf{w}_2\|$ . We say that  $F$  is  $\lambda$ -smooth if  $F'$  is  $\lambda$ -Lipschitz. Finally,  $F$  is *strongly convex* with parameter  $\kappa > 0$  if for all  $\mathbf{w}_1, \mathbf{w}_2 \in \mathcal{W}$ ,

$$F(\mathbf{w}_1) - F(\mathbf{w}_2) \geq \langle F'(\mathbf{w}_2), \mathbf{w}_1 - \mathbf{w}_2 \rangle + \frac{\kappa}{2} \|\mathbf{w}_1 - \mathbf{w}_2\|^2$$

for any norm  $\|\cdot\|$  on  $\mathcal{W}$ , though we shall be assuming  $\mathcal{W} \subseteq \mathbb{R}^d$ . If there exists  $\mathbf{w}^* \in \mathcal{W}$  such that  $F'(\mathbf{w}^*) = 0$ , then it follows that  $\mathbf{w}^*$  is the unique minimum of  $F$  on  $\mathcal{W}$ . Let  $f : \mathbb{R}^d \rightarrow \mathbb{R}$  be a continuously differentiable, convex,  $\lambda$ -smooth function. The following basic facts will be useful: for any choice of  $\mathbf{u}, \mathbf{v} \in \mathbb{R}^d$ , we have

$$f(\mathbf{u}) - f(\mathbf{v}) \leq \frac{\lambda}{2} \|\mathbf{u} - \mathbf{v}\|^2 + \langle f'(\mathbf{v}), \mathbf{u} - \mathbf{v} \rangle \quad (2)$$

$$\frac{1}{2\lambda} \|f'(\mathbf{u}) - f'(\mathbf{v})\|^2 \leq f(\mathbf{u}) - f(\mathbf{v}) - \langle f'(\mathbf{v}), \mathbf{u} - \mathbf{v} \rangle. \quad (3)$$

Proofs of these results can be found in any standard text on convex optimization, e.g. [5].

We shall leverage a special type of M-estimator here, built using the following convenient class of functions.

**Definition 1** (Function class for location estimates). Let  $\rho : \mathbb{R} \rightarrow [0, \infty)$  be an even function ( $\rho(u) = \rho(-u)$ ) with  $\rho(0) = 0$  and the following properties. Denote  $\psi(u) := \rho'(u)$ .

1.  $\rho(u) = O(u)$  as  $u \rightarrow \pm\infty$ .
2.  $\rho(u)/(u^2/2) \rightarrow 1$  as  $u \rightarrow 0$ .
3.  $\psi' > 0$ , and for some  $C > 0$ , and all  $u \in \mathbb{R}$ ,

$$-\log(1 - u + Cu^2) \leq \psi(u) \leq \log(1 + u + Cu^2).$$

Of particular importance in the proceeding analysis is the fact that  $\psi = \rho'$  is bounded, monotonically increasing and Lipschitz on  $\mathbb{R}$ , plus the upper/lower bounds which let us generalize the technique of Catoni [3].

*Example 2* (Valid  $\rho$  choices). In addition to the Gudermannian function (section 2 footnote), functions such as  $2(\sqrt{1 + u^2/2} - 1)$  and  $\log \cosh(u)$  are well-known examples that satisfy the desired criteria. Note that the wide/narrow functions of Catoni do not meet all these criteria, nor does the classic Huber function.

## A.2 Proofs

*Proof of Lemma 1 (main text).* For cleaner notation, write  $x_1, \dots, x_n \in \mathbb{R}$  for our iid observations. Here  $\rho$  is assumed to satisfy the conditions of Definition 1. A high-probability concentration inequality follows by direct application of the specified properties of  $\rho$  and  $\psi := \rho'$ , following the general technique laid out by Catoni [2, 3]. For  $u \in \mathbb{R}$  and  $s > 0$ , writing  $\psi_s(u) := \psi(u/s)$ , and taking expectation over the random draw of the sample,

$$\begin{aligned} \mathbf{E} \exp \left( \sum_{i=1}^n \psi_s(x_i - u) \right) &\leq \left( 1 + \frac{1}{s} (\mathbf{E} x - u) + \frac{C}{s^2} \mathbf{E}(x^2 + u^2 - 2xu) \right)^n \\ &\leq \exp \left( \frac{n}{s} (\mathbf{E} x - u) + \frac{Cn}{s^2} (\text{var } x + (\mathbf{E} x - u)^2) \right). \end{aligned}$$

The inequalities above are due to an application of the upper bound on  $\psi$ , and the inequality  $(1 + u) \leq \exp(u)$ . Now, letting

$$\begin{aligned} A &:= \frac{1}{n} \sum_{i=1}^n \psi_s(x_i - u) \\ B &:= \frac{1}{s} (\mathbf{E} x - u) + \frac{C}{s^2} (\text{var } x + (\mathbf{E} x - u)^2) \end{aligned}$$

we have a bound on  $\mathbf{E} \exp(nA) \leq \exp(nB)$ . By Chebyshev's inequality, we then have

$$\begin{aligned} \mathbf{P}\{A > B + \varepsilon\} &= \mathbf{P}\{\exp(nA) > \exp(nB + n\varepsilon)\} \\ &\leq \frac{\mathbf{E} \exp(nA)}{\exp(nB + n\varepsilon)} \\ &\leq \exp(-n\varepsilon). \end{aligned}$$

Setting  $\varepsilon = \log(\delta^{-1})/n$  for confidence level  $\delta \in (0, 1)$ , and for convenience writing

$$b(u) := \mathbf{E} x - u + \frac{C}{s} (\text{var } x + (\mathbf{E} x - u)^2),$$

we have with probability no less than  $1 - \delta$  that

$$\frac{s}{n} \sum_{i=1}^n \psi_s(x_i - u) \leq b(u) + \frac{s \log(\delta^{-1})}{n}. \quad (4)$$

The right hand side of this inequality, as a function of  $u$ , is a polynomial of order 2, and if

$$1 \geq D := 4 \left( \frac{C^2 \text{var } x}{s^2} + \frac{C \log(\delta^{-1})}{n} \right),$$

then this polynomial has two real solutions. In the hypothesis, we stated that the result holds “for large enough  $n$  and  $s_j$ .” By this we mean that we require  $n$  and  $s$  to satisfy the preceding inequality (for each  $j \in [d]$  in the multi-dimensional case). The notation  $D$  is for notational simplicity. The solutions take the form

$$u = \frac{1}{2} \left( 2 \mathbf{E} x + \frac{s}{C} \pm \frac{s}{C} (1 - D)^{1/2} \right).$$

Looking at the smallest of the solutions, noting  $D \in [0, 1]$  this can be simplified as

$$\begin{aligned} u_+ &:= \mathbf{E} x + \frac{s}{2C} \frac{(1 - \sqrt{1 - D})(1 + \sqrt{1 - D})}{1 + \sqrt{1 - D}} \\ &= \mathbf{E} x + \frac{s}{2C} \frac{D}{1 + \sqrt{1 - D}} \\ &\leq \mathbf{E} x + sD/2C, \end{aligned} \quad (5)$$

where the last inequality is via taking the  $\sqrt{1 - D}$  term in the previous denominator as small as possible. Now, writing  $\hat{x}$  as the M-estimate using  $s$  and  $\rho$  as in (3, main text), note that  $\hat{x}$  equivalently satisfies  $\sum_{i=1}^n \psi_s(\hat{x} - x_i) = 0$ . Using (4), we have

$$\frac{s}{n} \sum_{i=1}^n \psi_s(x_i - u_+) \leq b(u_+) + \frac{s \log(\delta^{-1})}{n} = 0,$$

and since the left-hand side of (4) is a monotonically decreasing function of  $u$ , we have immediately that  $\hat{x} \leq u_+$  on the event that (4) holds, which has probability at least  $1 - \delta$ . Then leveraging (5), it follows that on the same event,

$$\hat{x} - \mathbf{E} x \leq sD/2C.$$

An analogous argument provides a  $1 - \delta$  event on which  $\hat{x} - \mathbf{E} x \geq -sD/2C$ , and thus using a union bound, one has that

$$|\hat{x} - \mathbf{E} x| \leq 2 \left( \frac{C \text{var } x}{s} + \frac{s \log(\delta^{-1})}{n} \right) \quad (6)$$

holds with probability no less than  $1 - 2\delta$ . Setting the  $x_i$  to  $l'_j(\mathbf{w}; \mathbf{z}_i)$  for  $j \in [d]$  and some  $\mathbf{w} \in \mathbb{R}^d$ ,  $i \in [n]$ , and  $\hat{x}$  to  $\hat{\theta}_j$  corresponds to the special case considered in this Lemma. Dividing  $\delta$  by two yields the  $(1 - \delta)$  result.  $\square$

*Proof of Lemma 3 (main text).* For any fixed  $\mathbf{w}$  and  $j \in [d]$ , note that

$$\begin{aligned} |\hat{\theta}_j - g_j(\mathbf{w})| &\leq \varepsilon_j \\ &:= 2 \left( \frac{C \operatorname{var}_\mu l'_j(\mathbf{w}; \mathbf{z})}{s_j} + s_j \log(2\delta^{-1}) \right) \end{aligned} \quad (7)$$

$$\begin{aligned} &= 2 \sqrt{\frac{\log(2\delta^{-1})}{n}} \left( \frac{C \operatorname{var}_\mu l'_j(\mathbf{w}; \mathbf{z})}{\hat{\sigma}_j} + \hat{\sigma}_j \right) \\ &\leq \varepsilon^* := 2 \sqrt{\frac{V \log(2\delta^{-1})}{n}} c_0 \end{aligned} \quad (8)$$

holds with probability no less than  $1 - \delta$ . The first inequality holds via direct application of Lemma 1 (main text), which holds under (10, main text) and using  $\rho$  which satisfies (7, main text). The equality follows immediately from (5, main text). The final inequality follows from (A4) and (9, main text), along with the definition of  $c_0$ .

Making the dependence on  $\mathbf{w}$  explicit with  $\hat{\theta}_j = \hat{\theta}_j(\mathbf{w})$ , an important question to ask is how sensitive this estimator is to a change in  $\mathbf{w}$ . Say we perturb  $\mathbf{w}$  to  $\tilde{\mathbf{w}}$ , so that  $\|\mathbf{w} - \tilde{\mathbf{w}}\| = a > 0$ . By (A2), for any sample we have

$$\|l'(\mathbf{w}; \mathbf{z}_i) - l'(\tilde{\mathbf{w}}; \mathbf{z}_i)\| \leq \lambda \|\mathbf{w} - \tilde{\mathbf{w}}\| = \lambda a, \quad i \in [n]$$

which immediately implies  $|l'_j(\mathbf{w}; \mathbf{z}_i) - l'_j(\tilde{\mathbf{w}}; \mathbf{z}_i)| \leq \lambda a$  for all  $j \in [d]$  as well. Given a sample of  $n \geq 1$  points, the most extreme shift in  $\hat{\theta}_j(\cdot)$  that is feasible would be if, given the  $a$ -sized shift from  $\mathbf{w}$  to  $\tilde{\mathbf{w}}$ , *all* data points moved the maximum amount (namely  $\lambda a$ ) in the same direction. Since  $\hat{\theta}_j(\tilde{\mathbf{w}})$  is defined by balancing the distance between points to its left and right, the most it could conceivably shift is thus equal to  $\lambda a$ . That is, smoothness of the loss function immediately implies a Lipschitz property of the estimator,

$$|\hat{\theta}_j(\mathbf{w}) - \hat{\theta}_j(\tilde{\mathbf{w}})| \leq \lambda \|\mathbf{w} - \tilde{\mathbf{w}}\|.$$

Considering the vector of estimates  $\hat{\boldsymbol{\theta}}(\mathbf{w}) := (\hat{\theta}_1(\mathbf{w}), \dots, \hat{\theta}_d(\mathbf{w}))$ , we then have

$$\|\hat{\boldsymbol{\theta}}(\mathbf{w}) - \hat{\boldsymbol{\theta}}(\tilde{\mathbf{w}})\| \leq \sqrt{d} \lambda \|\mathbf{w} - \tilde{\mathbf{w}}\|. \quad (9)$$

This will be useful for proving uniform bounds on the estimation error shortly.

First, let's use these one-dimensional results for statements about the vector estimator of interest. In  $d$  dimensions, using  $\hat{\boldsymbol{\theta}}(\mathbf{w})$  just defined for any pre-fixed  $\mathbf{w}$ , then for any  $\varepsilon > 0$  we have

$$\begin{aligned} \mathbf{P} \left\{ \|\hat{\boldsymbol{\theta}}(\mathbf{w}) - \mathbf{g}(\mathbf{w})\| > \varepsilon \right\} &= \mathbf{P} \left\{ \|\hat{\boldsymbol{\theta}}(\mathbf{w}) - \mathbf{g}(\mathbf{w})\|^2 > \varepsilon^2 \right\} \\ &\leq \sum_{j=1}^d \mathbf{P} \left\{ |\hat{\theta}_j(\mathbf{w}) - g_j(\mathbf{w})| > \frac{\varepsilon}{\sqrt{d}} \right\}. \end{aligned}$$

Using the notation of  $\varepsilon_j$  and  $\varepsilon^*$  from (7), filling in  $\varepsilon = \sqrt{d}\varepsilon^*$ , we thus have

$$\begin{aligned} \mathbf{P} \left\{ \|\hat{\boldsymbol{\theta}}(\mathbf{w}) - \mathbf{g}(\mathbf{w})\| > \sqrt{d}\varepsilon^* \right\} &\leq \sum_{j=1}^d \mathbf{P} \left\{ |\hat{\theta}_j(\mathbf{w}) - g_j(\mathbf{w})| > \varepsilon^* \right\} \\ &\leq \sum_{j=1}^d \mathbf{P} \left\{ |\hat{\theta}_j(\mathbf{w}) - g_j(\mathbf{w})| > \varepsilon_j \right\} \\ &\leq d\delta. \end{aligned}$$

The second inequality is because  $\varepsilon_j \leq \varepsilon^*$  for all  $j \in [d]$ . It follows that the event

$$\mathcal{E}(\mathbf{w}) := \left\{ \|\hat{\boldsymbol{\theta}}(\mathbf{w}) - \mathbf{g}(\mathbf{w})\| > 2\sqrt{\frac{dV \log(2d\delta^{-1})}{n}} c_0 \right\}$$

has probability  $\mathbf{P} \mathcal{E}(\mathbf{w}) \leq \delta$ . In practice, however,  $\hat{\mathbf{w}}_{(t)}$  for all  $t > 0$  will be random, and depend on the sample. We seek uniform bounds using a covering number argument. By (A1),  $\mathcal{W}$  is closed and bounded, and thus compact, and it requires no more than  $N_\epsilon \leq (3\Delta/2\epsilon)^d$  balls of  $\epsilon$  radius to cover  $\mathcal{W}$ , where  $\Delta$  is the diameter of  $\mathcal{W}$ .<sup>1</sup> Write the centers of these  $\epsilon$  balls by  $\{\tilde{\mathbf{w}}_1, \dots, \tilde{\mathbf{w}}_{N_\epsilon}\}$ . Given  $\mathbf{w} \in \mathcal{W}$ , denote by  $\tilde{\mathbf{w}} = \tilde{\mathbf{w}}(\mathbf{w})$  the center closest to  $\mathbf{w}$ , which satisfies  $\|\mathbf{w} - \tilde{\mathbf{w}}\| \leq \epsilon$ . Estimation error is controllable using the following new error terms:

$$\|\hat{\boldsymbol{\theta}}(\mathbf{w}) - \mathbf{g}(\mathbf{w})\| \leq \|\hat{\boldsymbol{\theta}}(\mathbf{w}) - \hat{\boldsymbol{\theta}}(\tilde{\mathbf{w}})\| + \|\mathbf{g}(\mathbf{w}) - \mathbf{g}(\tilde{\mathbf{w}})\| + \|\hat{\boldsymbol{\theta}}(\tilde{\mathbf{w}}) - \mathbf{g}(\tilde{\mathbf{w}})\|. \quad (10)$$

The goal is to be able to take the supremum over  $\mathbf{w} \in \mathcal{W}$ . We bound one term at a time. The first term can be bounded, for any  $\mathbf{w} \in \mathcal{W}$ , by (9) just proven. The second term can be bounded by

$$\|\mathbf{g}(\mathbf{w}) - \mathbf{g}(\tilde{\mathbf{w}})\| \leq \lambda \|\mathbf{w} - \tilde{\mathbf{w}}\| \quad (11)$$

which follows immediately from (A2). Finally, for the third term, fixing any  $\mathbf{w} \in \mathcal{W}$ ,  $\tilde{\mathbf{w}} = \tilde{\mathbf{w}}(\mathbf{w}) \in \{\tilde{\mathbf{w}}_1, \dots, \tilde{\mathbf{w}}_{N_\epsilon}\}$  is also fixed, and can be bounded on the  $\delta$  event  $\mathcal{E}(\tilde{\mathbf{w}})$  just defined. The important fact is that

$$\sup_{\mathbf{w} \in \mathcal{W}} \|\hat{\boldsymbol{\theta}}(\tilde{\mathbf{w}}(\mathbf{w})) - \mathbf{g}(\tilde{\mathbf{w}}(\mathbf{w}))\| = \max_{k \in [N_\epsilon]} \|\hat{\boldsymbol{\theta}}(\tilde{\mathbf{w}}_k) - \mathbf{g}(\tilde{\mathbf{w}}_k)\|.$$

We construct a ‘‘good event’’ naturally as the event in which the bad event  $\mathcal{E}(\cdot)$  holds for no center on our  $\epsilon$ -net, namely

$$\mathcal{E}_+ = \left( \bigcap_{k \in [N_\epsilon]} \mathcal{E}(\tilde{\mathbf{w}}_k) \right)^c.$$

Taking a union bound, we can say that with probability no less than  $1 - \delta$ , for all  $\mathbf{w} \in \mathcal{W}$ , we have

$$\|\hat{\boldsymbol{\theta}}(\tilde{\mathbf{w}}(\mathbf{w})) - \mathbf{g}(\tilde{\mathbf{w}}(\mathbf{w}))\| \leq 2\sqrt{\frac{dV \log(2dN_\epsilon\delta^{-1})}{n}} c_0. \quad (12)$$

Taking the three new bounds together, we have with probability no less than  $1 - \delta$  that

$$\sup_{\mathbf{w} \in \mathcal{W}} \|\hat{\boldsymbol{\theta}}(\mathbf{w}) - \mathbf{g}(\mathbf{w})\| \leq \lambda\epsilon(\sqrt{d} + 1) + 2\sqrt{\frac{dV \log(2dN_\epsilon\delta^{-1})}{n}} c_0.$$

Setting  $\epsilon = 1/\sqrt{n}$  we have

$$\sup_{\mathbf{w} \in \mathcal{W}} \|\hat{\boldsymbol{\theta}}(\mathbf{w}) - \mathbf{g}(\mathbf{w})\| \leq \frac{\lambda(\sqrt{d} + 1)}{\sqrt{n}} + 2c_0\sqrt{\frac{dV(\log(2d\delta^{-1}) + d \log(3\Delta\sqrt{n}/2))}{n}}.$$

Since every step of Algorithm 1 (main text), with orthogonal projection if required, has  $\hat{\mathbf{w}}_{(t)} \in \mathcal{W}$ , the desired result follows from this uniform confidence interval.  $\square$

<sup>1</sup>This is a basic property of covering numbers for compact subsets of Euclidean space [4].

*Proof of Lemma 4 (main text).* Given  $\widehat{\mathbf{w}}_t$ , running the approximate update (2, main text), we have

$$\begin{aligned}\|\widehat{\mathbf{w}}_{(t+1)} - \mathbf{w}^*\| &= \|\widehat{\mathbf{w}}_t - \alpha \widehat{\mathbf{g}}(\widehat{\mathbf{w}}_t) - \mathbf{w}^*\| \\ &\leq \|\widehat{\mathbf{w}}_t - \alpha \mathbf{g}(\widehat{\mathbf{w}}_t) - \mathbf{w}^*\| + \alpha \|\widehat{\mathbf{g}}(\widehat{\mathbf{w}}_t) - \mathbf{g}(\widehat{\mathbf{w}}_t)\|.\end{aligned}$$

The first term looks at the distance from the target given an optimal update, using  $\mathbf{g}$ . Using the  $\kappa$ -strong convexity of  $R$ , via Nesterov [5, Thm. 2.1.15] it follows that

$$\|\widehat{\mathbf{w}}_t - \alpha \mathbf{g}(\widehat{\mathbf{w}}_t) - \mathbf{w}^*\|^2 \leq \left(1 - \frac{2\alpha\kappa\lambda}{\kappa + \lambda}\right) \|\widehat{\mathbf{w}}_t - \mathbf{w}^*\|^2.$$

Writing  $\beta := 2\kappa\lambda/(\kappa + \lambda)$ , the coefficient becomes  $(1 - \alpha\beta)$ .

To control the second term simply requires unfolding the recursion. By hypothesis, we can leverage (6, main text) to bound the statistical estimation error by  $\varepsilon$  for every step, all on the same  $1 - \delta$  “good event.” For notational ease, write  $a := \sqrt{1 - \alpha\beta}$ . On the good event, we have

$$\begin{aligned}\|\widehat{\mathbf{w}}_{(t+1)} - \mathbf{w}^*\| &\leq a^{t+1} \|\widehat{\mathbf{w}}_{(0)} - \mathbf{w}^*\| + \alpha\varepsilon (1 + a + a^2 + \dots + a^t) \\ &= a^{t+1} \|\widehat{\mathbf{w}}_{(0)} - \mathbf{w}^*\| + \alpha\varepsilon \frac{(1 - a^{t+1})}{1 - a}.\end{aligned}$$

To clean up the second summand,

$$\begin{aligned}\alpha\varepsilon \frac{(1 - a^{t+1})}{1 - a} &\leq \frac{\alpha\varepsilon(1 + a)}{(1 - a)(1 + a)} \\ &= \frac{\alpha\varepsilon(1 + \sqrt{1 - \alpha\beta})}{\alpha\beta} \\ &\leq \frac{2\varepsilon}{\beta}.\end{aligned}$$

Taking this to the original inequality yields the desired result.  $\square$

*Proof of Theorem 5 (main text).* Using strong convexity and (2), we have that

$$\begin{aligned}R(\widehat{\mathbf{w}}_{(T)}) - R^* &\leq \frac{\lambda}{2} \|\widehat{\mathbf{w}}_{(T)} - \mathbf{w}^*\|^2 \\ &\leq \lambda(1 - \alpha\beta)^T D_0^2 + \frac{4\lambda\varepsilon^2}{\beta^2}.\end{aligned}$$

The latter inequality holds by direct application of Lemma 4 (main text), followed by the elementary fact  $(a + b)^2 \leq 2(a^2 + b^2)$ . The particular value of  $\varepsilon$  under which Lemma 4 (main text) is valid (i.e., under which (6, main text) holds) is given by Lemma 3 (main text). Filling in  $\varepsilon$  with this concrete setting yields the desired result.  $\square$

*Proof of Lemma 8 (main text).* As in the result statement, we write

$$\Sigma_{(t)} := \mathbf{E}_\mu \left( l'(\widehat{\mathbf{w}}_{(t)}; \mathbf{z}) - \mathbf{g}(\widehat{\mathbf{w}}_{(t)}) \right) \left( l'(\widehat{\mathbf{w}}_{(t)}; \mathbf{z}) - \mathbf{g}(\widehat{\mathbf{w}}_{(t)}) \right)^T, \quad \mathbf{w} \in \mathcal{W}.$$

Running this modified version of Algorithm 1 (main text), we are minimizing the bound in Lemma 1 (main text) as a function of scale  $s_j$ ,  $j \in [d]$ , which immediately implies that the estimates  $\widehat{\boldsymbol{\theta}}_{(t)} = (\widehat{\theta}_1, \dots, \widehat{\theta}_d)$  at each step  $t$  satisfy

$$|\widehat{\theta}_j - g_j(\widehat{\mathbf{w}})| > 4 \left( \frac{C \operatorname{var}_\mu l'_j(\widehat{\mathbf{w}}_{(t)}; \mathbf{z}) \log(2\delta^{-1})}{n} \right)^{1/2} \quad (13)$$

with probability no greater than  $\delta$ . For clean notation, let us also denote

$$A := 4 \left( \frac{C \log(2\delta^{-1})}{n} \right)^{1/2}, \quad \varepsilon^* := A \sqrt{\text{trace}(\Sigma_{(t)})}.$$

For the vector estimates then, we have

$$\begin{aligned} & \mathbf{P} \left\{ \|\widehat{\boldsymbol{\theta}}_{(t)} - \mathbf{g}(\widehat{\mathbf{w}}_{(t)})\| > \varepsilon^* \right\} \\ &= \mathbf{P} \left\{ \sum_{j=1}^d \frac{(\widehat{\theta}_j - g_j(\widehat{\mathbf{w}}_{(t)}))^2}{A^2} > \text{trace}(\Sigma_{(t)}) \right\} \\ &= \mathbf{P} \left\{ \sum_{j=1}^d \left( \frac{(\widehat{\theta}_j - g_j(\widehat{\mathbf{w}}_{(t)}))^2}{A^2} - \text{var}_{\mu} l'_j(\widehat{\mathbf{w}}_{(t)}; \mathbf{z}) \right) > 0 \right\} \\ &\leq \mathbf{P} \bigcup_{j=1}^d \left\{ \frac{(\widehat{\theta}_j - g_j(\widehat{\mathbf{w}}_{(t)}))^2}{A^2} > \text{var}_{\mu} l'_j(\widehat{\mathbf{w}}_{(t)}; \mathbf{z}) \right\} \\ &\leq d\delta. \end{aligned}$$

The first inequality uses a union bound, and the second inequality follows from (13). Plugging in  $A$  and taking confidence  $\delta/d$  implies the desired result.  $\square$

*Proof of Theorem 9 (main text).* From Lemma 8 (main text), the estimation error has exponential tails, as follows. Writing

$$A_1 := 2d, \quad A_2 := 4 \left( \frac{C \text{trace}(\Sigma_{(t)})}{n} \right)^{1/2},$$

for each iteration  $t$  we have

$$\mathbf{P} \{ \|\widehat{\boldsymbol{\theta}}_{(t)} - \mathbf{g}(\widehat{\mathbf{w}}_{(t)})\| > \varepsilon \} \leq A_1 \exp \left( - \left( \frac{\varepsilon}{A_2} \right)^2 \right).$$

Controlling moments using exponential tails can be done using a fairly standard argument. For random variable  $X \in \mathcal{L}_p$  for  $p \geq 1$ , we have the classic inequality

$$\mathbf{E} |X|^p = \int_0^\infty \mathbf{P} \{ |X|^p > t \} dt$$

as a starting point. Setting  $X = \|\widehat{\boldsymbol{\theta}}_{(t)} - \mathbf{g}(\widehat{\mathbf{w}}_{(t)})\| \geq 0$ , and using substitution of variables twice, we have

$$\begin{aligned} \mathbf{E} |X|^p &= \int_0^\infty \mathbf{P} \{ X > t^{1/p} \} dt \\ &= \int_0^\infty \mathbf{P} \{ X > t \} p t^{p-1} dt \\ &\leq A_1 p \int_0^\infty \exp \left( - (t/A_2)^2 \right) t^{p-1} dt \\ &= \frac{A_1 A_2^p p}{2} \int_0^\infty \exp(-t) t^{p/2-1} dt. \end{aligned}$$

The last integral on the right-hand side, written  $\Gamma(p/2)$ , is the usual Gamma function of Euler evaluated at  $p/2$ . Setting  $p = 2$ , we have  $\Gamma(1) = 0! = 1$ , and plugging in the values of  $A_1$  and  $A_2$  yields the desired result.  $\square$

### A.3 Computational methods

Here we discuss precisely how to compute the implicitly-defined M-estimates of (3, main text) and (5, main text). Assuming  $s > 0$  and real-valued observations  $x_1, \dots, x_n$ , we first look at the program

$$\min_{\theta} \frac{1}{n} \sum_{i=1}^n \rho_s(x_i - \theta)$$

assuming  $\rho$  is as specified in Definition 1, with  $\psi = \rho'$ . Write  $\hat{\theta}$  for this unique minimum, and note that it satisfies

$$\frac{s}{n} \sum_{i=1}^n \psi_s(x_i - \hat{\theta}) = 0.$$

Indeed, by monotonicity of  $\psi$ , this  $\hat{\theta}$  can be found via  $\rho$  minimization or root-finding. The latter yields standard fixed-point iterative updates, such as

$$\hat{\theta}_{(k+1)} = \hat{\theta}_{(k)} + \frac{s}{n} \sum_{i=1}^n \psi_s(x_i - \hat{\theta}_{(k)}).$$

Note the right-hand side has a fixed point at the desired value. In our routines, we use the Gudermannian function

$$\rho(u) := \int_0^u \psi(x) dx, \quad \psi(u) := 2 \operatorname{atan}(\exp(u)) - \pi/2$$

which can be readily confirmed to satisfy all requirements of Definition 1.

For the dispersion estimate to be used in re-scaling, we introduce function  $\chi$ , which is even, non-decreasing on  $\mathbb{R}_+$ , and satisfies

$$0 < \left| \lim_{u \rightarrow \pm\infty} \chi(u) \right| < \infty, \quad \chi(0) < 0.$$

In practice, we take dispersion estimate  $\hat{\sigma} > 0$  as any value satisfying

$$\frac{1}{n} \sum_{i=1}^n \chi\left(\frac{x_i - \gamma}{\hat{\sigma}}\right) = 0$$

where  $\gamma = n^{-1} \sum_{i=1}^n x_i$ , computed by the iterative procedure

$$\hat{\sigma}_{(k+1)} = \hat{\sigma}_{(k)} \left( 1 - \frac{1}{\chi(0)n} \sum_{i=1}^n \chi\left(\frac{x_i - \gamma}{\hat{\sigma}_{(k)}}\right) \right)^{1/2}$$

which has the desired fixed point, as in the location case. Our routines use the quadratic Geman-type  $\chi$ , defined

$$\chi(u) := \frac{u^2}{1 + u^2} - c$$

with parameter  $c > 0$ , noting  $\chi(0) = -c$ . Writing the first term as  $\chi_0$  so  $\chi(u) = \chi_0(u) - c$ , we set  $c = \mathbf{E} \chi_0(x)$  under  $x \sim N(0, 1)$ . Computed via numerical integration, this is  $c \approx 0.34$ .



## References

- [1] Ash, R. B. and Doleans-Dade, C. (2000). *Probability and Measure Theory*. Academic Press.
- [2] Catoni, O. (2009). High confidence estimates of the mean of heavy-tailed real random variables. *arXiv preprint arXiv:0909.5366*.
- [3] Catoni, O. (2012). Challenging the empirical mean and empirical variance: a deviation study. *Annales de l'Institut Henri Poincaré, Probabilités et Statistiques*, 48(4):1148–1185.
- [4] Kolmogorov, A. N. (1993).  $\varepsilon$ -entropy and  $\varepsilon$ -capacity of sets in functional spaces. In Shiryayev, A. N., editor, *Selected Works of A. N. Kolmogorov, Volume III: Information Theory and the Theory of Algorithms*, pages 86–170. Springer.
- [5] Nesterov, Y. (2004). *Introductory Lectures on Convex Optimization: A Basic Course*. Springer.
- [6] Talvila, E. (2001). Necessary and sufficient conditions for differentiating under the integral sign. *American Mathematical Monthly*, 108(6):544–548.
